# Supplementary material
Source: publisher figshare collection journal article supplement (https://frontiersin.figshare.com/ndownloader/files/13891715)
Supplement: Supplementary file [file 13891715]

**Supplemental Figure 1. 384-well Plate Outline.**

|   | 1  | 2    | 3 | 4 | 5 | 6          | 7 | 8 | 9 | 10 | 11 | 12   | 13   | 14 | 15 | 16 | 17         | 18 | 19 | 20 | 21 | 22 | 23   | 24 |
|---|----|------|---|---|---|------------|---|---|---|----|----|------|------|----|----|----|------------|----|----|----|----|----|------|----|
| A | BI | Ctrl |   |   |   | Compound 1 |   |   |   |    |    | Ctrl | Ctrl |    |    |    | Compound 1 |    |    |    |    |    | Ctrl | BI |
| B | BI | Ctrl |   |   |   | Compound 1 |   |   |   |    |    | Ctrl | Ctrl |    |    |    | Compound 1 |    |    |    |    |    | Ctrl | BI |
| C | BI | Ctrl |   |   |   | Compound 2 |   |   |   |    |    | Ctrl | Ctrl |    |    |    | Compound 2 |    |    |    |    |    | Ctrl | BI |
| D | BI | Ctrl |   |   |   | Compound 2 |   |   |   |    |    | Ctrl | Ctrl |    |    |    | Compound 2 |    |    |    |    |    | Ctrl | BI |
| E | BI | Ctrl |   |   |   | Compound 3 |   |   |   |    |    | Ctrl | Ctrl |    |    |    | Compound 3 |    |    |    |    |    | Ctrl | BI |
| F | BI | Ctrl |   |   |   | Compound 3 |   |   |   |    |    | Ctrl | Ctrl |    |    |    | Compound 3 |    |    |    |    |    | Ctrl | BI |
| G | BI | Ctrl |   |   |   | Compound 4 |   |   |   |    |    | Ctrl | Ctrl |    |    |    | Compound 4 |    |    |    |    |    | Ctrl | BI |
| H | BI | Ctrl |   |   |   | Compound 4 |   |   |   |    |    | Ctrl | Ctrl |    |    |    | Compound 4 |    |    |    |    |    | Ctrl | BI |
| I | BI | Ctrl |   |   |   | Compound 5 |   |   |   |    |    | Ctrl | Ctrl |    |    |    | Compound 5 |    |    |    |    |    | Ctrl | BI |
| J | BI | Ctrl |   |   |   | Compound 5 |   |   |   |    |    | Ctrl | Ctrl |    |    |    | Compound 5 |    |    |    |    |    | Ctrl | BI |
| K | BI | Ctrl |   |   |   | Compound 6 |   |   |   |    |    | Ctrl | Ctrl |    |    |    | Compound 6 |    |    |    |    |    | Ctrl | BI |
| L | BI | Ctrl |   |   |   | Compound 6 |   |   |   |    |    | Ctrl | Ctrl |    |    |    | Compound 6 |    |    |    |    |    | Ctrl | BI |
| M | BI | Ctrl |   |   |   | Compound 7 |   |   |   |    |    | Ctrl | Ctrl |    |    |    | Compound 7 |    |    |    |    |    | Ctrl | BI |
| N | BI | Ctrl |   |   |   | Compound 7 |   |   |   |    |    | Ctrl | Ctrl |    |    |    | Compound 7 |    |    |    |    |    | Ctrl | BI |
| O | BI | Ctrl |   |   |   | Compound 8 |   |   |   |    |    | Ctrl | Ctrl |    |    |    | Compound 8 |    |    |    |    |    | Ctrl | BI |
| P | BI | Ctrl |   |   |   | Compound 8 |   |   |   |    |    | Ctrl | Ctrl |    |    |    | Compound 8 |    |    |    |    |    | Ctrl | BI |

BI – Blank (VecStem™ cell growth media only)

Ctrl – Control (no treatment)

8 compounds were tested in 8 ECFC lines from 4 donors. Positioning of 2 ECFC clones per plate with 8 compounds/plate/clone. See also raw data in Supplemental Table 1 (Excel file).
